# Supplementary material
Source: MDPI journal article supplement (https://www.mdpi.com/2073-4441/13/9/1263)
Supplement: s1 [file s1]

## Supplementary Materials

# Horizontal Distribution of Deep Sea Microplankton: A New Point of View for Marine Biogeography

Jessica Vannini <sup>1,2</sup>, Lidia Yebra <sup>2</sup>, Antonia Granata <sup>3</sup>, Letterio Guglielmo <sup>4</sup>, Salvatore Moscatello <sup>1</sup> and Genuario Belmonte <sup>1,\*</sup>

**Table S1.** Location of the 27 stations where the collection of microplankton was carried out in summer 2017. In each station are also indicated the two depths where the samples have been collected (S: surface, MD: maximum depth) and the water volume (L) filtered for each sample, and the abiotic parameters obtained from a multiparametric probe: Temperature (°C), Salinity and Chlorophyll a ( $\mu\text{g}\cdot\text{L}^{-1}$ ).

| STATION Code | LOCALITY         | LAT North | LONG East | WATER column m | SAMPLES |   |      |     | TEMPERATURE |      | SALINITY |      | CHLOROPHYLL |      |
|--------------|------------------|-----------|-----------|----------------|---------|---|------|-----|-------------|------|----------|------|-------------|------|
|              |                  |           |           |                | S m     | L | MD m | L   | S           | MD   | S        | MD   | S           | MD   |
| UST          | USTICA           | 38°54.99' | 13°17.95' | 3438           | 2       | 5 | /    | /   | 25.7        | –    | 37.9     | –    | 0.01        | –    |
| EOL          | EOLIE            | 38°26.46' | 15°09.60' | 1180           | 2       | 5 | 500  | 10  | 25.6        | 14.3 | 38.0     | 38.8 | 0.01        | 0.01 |
| CTI          | CENT. TYRRHENIAN | 39°29.98' | 13°33.99' | 3301           | 2       | 5 | 500  | 10  | 25.4        | 14.3 | 38.2     | 38.8 | 0.01        | 0.00 |
| OROS         | OROSEI           | 40°03.63' | 10°24.11' | 2253           | 2       | 5 | 500  | 10  | 25.1        | 14.2 | 38.4     | 38.8 | 0.00        | 0.00 |
| OLB          | OLBIA            | 40°51.27' | 10°02.85' | 1231           | 2       | 5 | 500  | 10  | 23.9        | 14.0 | 38.2     | 38.7 | 0.02        | 0.00 |
| CAPR         | CAPRAIA          | 43°00.42' | 09°40.26' | 405            | 2       | 5 | 380  | 10  | 24.6        | 14.1 | 38.2     | 38.7 | 0.03        | 0.01 |
| GORG         | GORGONA          | 43°26.54' | 10°02.10' | 128            | 2       | 5 | 123  | 10  | 25.3        | 14.1 | 38.2     | 38.4 | 0.03        | 0.02 |
| ANZ          | ANZIO            | 41°21.69' | 12°10.76' | 733            | 2       | 5 | 500  | 10  | 26.0        | 14.1 | 38.4     | 38.7 | 0.01        | 0.00 |
| NAP          | NAPLES-ISCHIA    | 40°37.72' | 13°59.57' | 790            | 2       | 5 | 500  | 10  | 26.0        | 14.1 | 38.4     | 38.7 | 0.01        | 0.00 |
| EGA          | EGADI            | 38°57.79' | 12°08.68' | 101            | 4       | 5 | 97   | 10  | 24.6        | 15.0 | 38.0     | 38.3 | 0.01        | 0.09 |
| PANT         | PANTELLERIA      | 36°40.77' | 11°49.12' | 575            | 2       | 5 | 500  | 10  | 25.7        | 14.2 | 37.3     | 38.8 | 0.00        | 0.00 |
| PEM          | PORTO EMPEDOCLE  | 37°07.79' | 13°20.80' | 440            | 2       | 5 | 430  | 10  | 26.2        | 14.2 | 37.9     | 38.8 | 0.01        | 0.00 |
| GEL          | GELA             | 36°45.52' | 14°08.01' | 780            | 2       | 5 | 500  | 10  | 27.2        | 14.4 | 37.9     | 38.9 | 0.01        | 0.00 |
| AUG          | AUGUSTA          | 37°11.14' | 15°32.94' | 2300           | 2       | 5 | 500  | 10  | 25.8        | 14.2 | 37.8     | 38.8 | 0.01        | 0.00 |
| TAO          | TAORMINA         | 37°46.09' | 15°34.95' | 1570           | 3.5     | 5 | 500  | 10  | 25.1        | 14.2 | 38.8     | 38.9 | 0.02        | 0.00 |
| SOV          | SOVERATO         | 38°27.44' | 16°40.33' | 206            | 1.6     | 5 | 200  | 10  | 26.4        | 14.4 | 38.5     | 38.9 | 0.01        | 0.00 |
| AME          | AMENDOLARA       | 39°44.91' | 16°46.06' | 475            | 3       | 5 | 470  | 10  | 24.8        | 14.0 | 39.0     | 38.8 | 0.03        | 0.00 |
| CAMA         | CAMPOMARINO      | 40°07.97' | 17°24.91' | 1000           | 2       | 5 | 500  | 10  | 25.9        | 14.0 | 39.0     | 38.8 | 0.01        | 0.00 |
| LEU          | LEUCA            | 39°34.11' | 18°12.38' | 550            | 2.3     | 5 | 500  | 10  | 26.6        | 14.0 | 39.0     | 38.8 | 0.01        | 0.00 |
| OTR 1        | OTRANTO 1        | 40°05.22' | 18°44.36' | 94             | 4       | 5 | 90   | 8.5 | 26.7        | 14.7 | 39.0     | 38.9 | 0.00        | 0.07 |
| OTR 2        | OTRANTO 2        | 40°04.42' | 18°45.37' | 169            | 1.8     | 5 | 165  | 10  | 26.7        | 15.0 | 39.0     | 38.9 | 0.02        | 0.18 |
| ADR          | ADRIATIC         | 40°27.29' | 18°33.34' | 125            | 2.5     | 5 | 120  | 10  | 27.1        | 14.7 | 39.0     | 38.9 | 0.02        | 0.07 |
| BA           | BARI             | 41°20.25' | 17°12.05' | 623            | 2       | 5 | 500  | 10  | 27.5        | 13.9 | 39.1     | 38.8 | 0.01        | 0.01 |
| VIE          | VIESTE           | 42°14.97' | 15°50.60' | 125            | 2.6     | 5 | 122  | 10  | 27.7        | 13.4 | 39.0     | 38.8 | 0.03        | 0.07 |
| SEN          | SENIGALLIA       | 43°51.82' | 13°25.52' | 52             | 2       | 5 | 50   | 10  | 27.9        | 14.6 | 38.2     | 38.2 | 0.04        | 0.26 |
| DEP          | PO RIVER DELTA   | 44°38.66' | 12°36.62' | 33             | 2.2     | 5 | 31   | 10  | 27.4        | 13.5 | 34.4     | 38.2 | 0.20        | 0.66 |
| TRI          | TRIESTE          | 45°39.74' | 13°39.85' | 25             | 2       | 5 | 23   | 10  | 23.9        | 19.0 | 36.2     | 37.8 | 0.20        | 0.30 |

**Table S2.** Location of the 39 stations interested by collection of microplankton in spring 2013.

| STATION<br>Code | LOCALITY          | LAT       | LONG      | WATER  |      |   | SAMPLES |      | Deep |
|-----------------|-------------------|-----------|-----------|--------|------|---|---------|------|------|
|                 |                   | North     | East      | Column | m    | L | Surf    | L    |      |
| 2               | GARGANO           | 42°10.00' | 16°10.09' | 27     | 3    | 5 | 121     | 5    |      |
| Tre             | TREMITI           | 42°06.41' | 15°36.91' | 84     | 3    | 5 | 79      | 5    |      |
| 3               | PELAGOSA          | 42°10.01' | 16°37.99' |        | 179  | 3 | 5       | 174  | 5    |
| Bud             | BUDVA             | 42°10.81' | 18°50.00' |        | 85   | 3 | 5       | 80   | 5    |
| 7               | MONTEN. SHELF     | 42°09.99' | 18°31.99' |        | 188  | 3 | 5       | 183  | 5    |
| 10              | SOUTH ADRIATIC NE | 41°29.99' | 18°21.98' |        | 1129 | 3 | 5       | 1120 | 5    |
| 8               | ALBANIAN SHELF 1  | 41°29.97' | 18°50.13' |        | 330  | 3 | 5       | 325  | 5    |
| Ulq             | ULQNIJ            | 41°49.49' | 19°12.60' |        | 69   | 3 | 5       | 64   | 5    |
| Bar             | BAR               | 42°02.23' | 19°00.22' | 71     | 3    | 5 | 66      | 5    |      |
| 15              | SOUTH ADRIATIC CE | 41°02.30' | 18°32.00' |        | 937  | 3 | 5       | 932  | 10   |
| 16c             | SOUTH ADRIATIC SE | 40°53.07' | 18°57.28' |        | 317  | 3 | 5       | 311  | 10   |
| 17              | OTRANTO CHANN NE  | 40°26.97' | 19°07.97' |        | 344  | 3 | 5       | 339  | 10   |
| Saz             | SAZAN             | 40°30.23' | 19°13.60' |        | 119  | 3 | 5       | 114  | 5    |
| Vlo             | GIJRI VLORE       | 40°26.90' | 19°21.02' |        | 28   | 3 | 5       | 23   | 5    |
| KGj             | KEPI I GJUEZES    | 40°25.21' | 19°13.87' |        | 147  | 3 | 5       | 142  | 5    |
| Kar             | KARABURUN 1       | 40°22.11' | 19°18.87' |        | 93   | 3 | 5       | 88   | 5    |
| Ari             | PLAZH ARI         | 40°18.43' | 19°20.32' |        | 135  | 3 | 5       | 130  | 5    |
| Rre             | RREZA             | 40°14.32' | 18°23.34' |        | 205  | 3 | 5       | 200  | 5    |
| Gra             | GRAMA             | 40°10.32' | 19°23.60' | 238    |      | 3 | 5       | 233  | 5    |
| 22              | OTRANTO CHANN SE  | 40°07.59' | 19°18'51" |        | 978  | 3 | 5       | 969  | 10   |
| 21              | OTRANTO CHANN S   | 40°05.00' | 19°08.00' |        | 974  | 3 | 5       | 969  | 10   |
| KQe             | KEPI I QEFALE     | 39°52.70' | 19°52.38' |        | 67   | 3 | 5       | 62   | 5    |
| Ere             | EREIKUSSA         | 39°52.04' | 19°32.18' |        | 94   | 3 | 5       | 89   | 5    |
| Mat             | MATHRAKI          | 39°44.27' | 19°29.09' |        | 122  | 3 | 5       | 117  | 5    |
| 23              | IONIAN NE         | 39°40.00' | 19°22.00' |        | 1173 | 3 | 5       | 1168 | 10   |
| 24              | IONIAN N          | 39°39.99' | 19°07.93' | 1088   | 3    | 5 | 1083    | 10   |      |
| 25              | IONIAN NW         | 39°39.99' | 18°21.98' |        | 220  | 3 | 5       | 215  | 5    |
| Leu             | LEUCA             | 39°45.68' | 18°24.22' |        | 121  | 3 | 5       | 116  | 5    |
| And             | ANDRANO           | 39°57.18' | 18°27.40' |        | 89   | 3 | 5       | 84   | 5    |
| 20              | OTRANTO CHANN SW  | 40°05.00' | 18°50.04' |        | 738  | 3 | 5       | 733  | 5    |
| Otr             | OTRANTO           | 40°06.00' | 18°34.08' | 92     | 3    | 5 | 87      | 10   |      |
| San             | SAN ANDREA        | 40°13.87' | 18°30.37' |        | 79   | 3 | 5       | 74   | 5    |
| Bri             | BRINDISI          | 40°42.75' | 17°57.90' | 93     | 3    | 5 | 88      | 5    |      |
| PnG             | PENNA GROSSA      | 40°45.67' | 17°47.00' | 67     | 3    | 5 | 62      | 5    |      |
| 19              | OTRANTO CHANN NW  | 40°27.03' | 18°31.99' |        | 93   | 3 | 5       | 88   | 5    |
| 14              | SOUTH ADRIATIC CC | 41°02.28' | 17°52.01' |        | 595  | 3 | 5       | 590  | 10   |
| 13              | SOUTH ADRIATIC CW | 41°02.30' | 17°35.04' |        | 268  | 3 | 5       | 263  | 5    |
| 12              | SOUTH ADRIATIC NW | 41°29.97' | 16°55.01' |        | 134  | 3 | 5       | 129  | 5    |
| 11              | SOUTH ADRIATIC NC | 41°30.16' | 17°32.93' |        | 1126 | 3 | 5       | 1121 | 10   |

**Table S3.** Location of the 24 stations interested by collection of microplankton in winter 2015. In each station it is indicated the depth (m) where the samples have been collected (at Surface, Surf, and maximum depth, Deep), and the total volume (L) of water filtered per sample.

| STATION<br>Code | LOCALITY           | LAT       |           | LONG<br>Column<br>m | WATER     |           | SAMPLES |    |
|-----------------|--------------------|-----------|-----------|---------------------|-----------|-----------|---------|----|
|                 |                    | North     | East      |                     | Surf<br>L | Deep<br>m | L       |    |
| CaB             | CANYON BARI        | 41°19.55' | 17°04.45' | 216                 | 2         | 5         | 209     | 5  |
| 2               | GARGANO            | 42°10.00' | 16°09.99' | 120                 | 2         | 5         | 115     | 5  |
| 3               | PELAGOSA           | 42°10.00' | 16°38.01' | 177                 | 2         | 5         | 173     | 5  |
| 11              | SOUTH ADRIATIC NC  | 41°30.00' | 17°35.02' | 1149                | 2         | 5         | 1124    | 10 |
| 12              | SOUTH ADRIATIC NW  | 41°30.01' | 16°55.01' | 134                 | 3         | 5         | 131     | 5  |
| 13              | SOUTH ADRIATIC CW  | 41°02.30' | 17°35.01' | 259                 | 2         | 5         | 255     | 5  |
| PnG             | PENNAGROSSA        | 40°45.66' | 17°46.99' | 64                  | 3         | 5         | 61      | 5  |
| 14              | SOUTH ADRIATIC CC  | 41°02.31' | 17°52.00' | 599                 | 3         | 5         | 594     | 10 |
| 10              | SOUTH ADRIATIC NE  | 41°30.06' | 18°22.64' | 1122                | 3         | 5         | 1117    | 10 |
| Al2             | ALBANIAN SHELF 2   | 41°30.01' | 19°18.00' | 70                  | 2         | 5         | 67      | 5  |
| 8               | ALBANIAN SHELF 1   | 41°26.92' | 18°51.43' | 284                 | 3         | 5         | 280     | 5  |
| 15              | SOUTH ADRIATIC CE  | 41°00.99' | 18°40.55' | 818                 | 2         | 5         | 813     | 10 |
| Al3             | ALBANIAN SHELF 3   | 41°00.00' | 19°18.00' | 68                  | 2         | 5         | 64      | 5  |
| 17              | OTRANTO CHANNEL NE | 40°27.02' | 19°07.99' | 337                 | 2         | 5         | 334     | 10 |
| 21              | OTRANTO CHANNEL S  | 40°05.01' | 19°08.00' | 969                 | 3         | 5         | 965     | 10 |
| 22              | OTRANTO CHANNEL SE | 40°05.01' | 19°21.99' | 957                 | 2         | 5         | 952     | 10 |
| Rre             | RREZA              | 40°14.41' | 19°23.41' | 199                 | 2         | 5         | 195     | 5  |
| Kar1            | KARABURUN 1        | 40°22.09' | 19°18.84' | 87                  | 2         | 5         | 84      | 5  |
| Kar2            | KARABURUN 2        | 40°22.09' | 19°14.35' | 228                 | 2         | 5         | 224     | 5  |
| Kar3            | KARABURUN 3        | 40°22.07' | 19°09.82' | 660                 | 2         | 5         | 655     | 10 |
| 19              | OTRANTO CHANNEL NW | 40°27.00' | 18°32.01' | 120                 | 2         | 5         | 115     | 5  |
| 20              | OTRANTO CHANNEL S  | 40°05.01' | 18°50.00' | 732                 | 2         | 5         | 727     | 10 |
| Otr             | OTRANTO            | 40°05.91' | 18°34.07' | 87                  | 2         | 5         | 84      | 5  |
| And             | ANDRANO            | 39°57.13' | 18°27.35' | 84                  | 2         | 5         | 80      | 5  |

**Table S4.** Water characteristics at surface (3 m) and bottom (different depths) of 39 stations, for the collection of microplankton samples in South Adriatic Sea. Period of collection: 09–18 May 2013.

| STATION | LOCALITY           | DEPTH, m | SAL, psu | TEMP, °C |
|---------|--------------------|----------|----------|----------|
| 2       | GARGANO            | 3        | 37.6     | 18.9     |
|         |                    | 121      | 38.7     | 12.3     |
| Tre     | TREMITI            | 3        | 37.5     | 20.2     |
|         |                    | 79       | 38.6     | 12.6     |
| 3       | PELAGOSA           | 3        | 38.6     | 19.2     |
|         |                    | 174      | 38.7     | 12.6     |
| Bud     | BUDVA              | 3        | 33.2     | 21.2     |
|         |                    | 80       | 38.9     | 15.0     |
| 7       | MONTENEGRO SHELF   | 3        | 33.2     | 21.2     |
|         |                    | 183      | 39.0     | 14.9     |
| 10      | SOUTH ADRIATIC NE  | 3        | 38.8     | 20.0     |
|         |                    | 1120     | 38.7     | 13.1     |
| 8       | ALBANIAN SHELF     | 3        | 38.0     | 20.2     |
|         |                    | 325      | 38.9     | 14.6     |
| Ulq     | ULQNIJ             | 3        | 31.1     | 20.2     |
|         |                    | 64       | 38.9     | 15.0     |
| Bar     | BAR                | 3        | 33.7     | 21.3     |
|         |                    | 66       | 38.8     | 15.0     |
| 15      | SOUTH ADRIATIC CE  | 3        | 31.1     | 20.2     |
|         |                    | 932      | 38.7     | 19.6     |
| 16c     | SOUTH ADRIATIC SE  | 3        | 38.6     | 20.2     |
|         |                    | 311      | 38.9     | 14.7     |
| 17      | OTRANTO CHANNEL NE | 3        | 38.4     | 19.4     |
| 339     | 38.9 14.8          |          |          |          |
| Saz     | SAZAN              | 3        | 38.1     | 20.6     |
|         |                    | 114      | 38.9     | 15.0     |
| GVL     | GIJRI VLORE        | 3        | 38.2     | 20.1     |
|         |                    | 23       | 38.8     | 16.0     |
| KGj     | KEPI I GJUEZES     | 3        | 38.3     | 18.9     |
|         |                    | 142      | 39.0     | 15.0     |
| Kar     | KARABURUN          | 3        | 38.9     | 15.8     |
|         |                    | 88       | 38.9     | 15.3     |
| Par     | PLAZH ARI          | 3        | 38.9     | 16.0     |
|         |                    | 130      | 38.9     | 15.1     |
| Rre     | RREZA              | 3        | 38.9     | 15.7     |
|         |                    | 200      | 39.0     | 15.0     |
| Gra     | GRAMA              | 3        | 38.9     | 16.6     |
|         |                    | 233      | 39.0     | 15.0     |
| 22      | OTRANTO CHANNEL SE | 3        | 38.8     | 16.7     |
|         |                    | 869      | 38.8     | 13.7     |
| 21      | OTRANTO CHANNEL S  | 3        | 38.8     | 17.9     |
|         |                    | 968      | 38.8     | 13.6     |
| Kqe     | KEPI I QEFALE      | 3        | 38.5     | 18.9     |
|         |                    | 65       | 38.9     | 15.3     |
| Ere     | EREIKUSSA          | 3        | 38.9     | 18.1     |
|         |                    | 88       | 39.0     | 15.3     |
| Mat     | MATHRAKI           | 3        | 38.8     | 18.4     |
|         |                    | 117      | 39.0     | 15.2     |
| 23      | IONIAN SEA NE      | 3        | 38.9     | 18.5     |
|         |                    | 1168     | 38.8     | 13.5     |
| 24      | IONIAN SEA N       | 3        | 38.9     | 19.0     |
|         |                    | 1083     | 38.8     | 13.4     |

---

|     |                    |      |      |      |  |
|-----|--------------------|------|------|------|--|
| 24  | IONIAN SEA NW      | 3    | 38.8 | 19.0 |  |
|     |                    | 215  | 38.9 | 14.3 |  |
| Leu | LEUCA              | 3    | 38.1 | 19.0 |  |
|     |                    | 116  | 38.9 | 14.6 |  |
| And | ANDRANO            | 3    | 38.1 | 19.1 |  |
|     |                    | 84   | 38.9 | 14.9 |  |
| 20  | OTRANTO CHANNEL SW | 3    | 38.8 | 19.0 |  |
|     |                    | 733  | 38.8 | 13.5 |  |
| Otr | OTRANTO            | 3    | 38.2 | 19.0 |  |
|     |                    | 87   | 38.9 | 14.9 |  |
| San | SAN ANDREA         | 3    | 38.3 | 18.9 |  |
|     |                    | 74   | 38.9 | 14.9 |  |
| Bri | BRINDISI           | 3    | 38.0 | 18.6 |  |
|     |                    | 88   | 38.9 | 14.7 |  |
| PnG | PENNA GROSSA       | 3    | 38.3 | 18.4 |  |
|     |                    | 62   | 38.9 | 14.8 |  |
| 19  | OTRANTO CHANNEL NW | 3    | 38.2 | 18.9 |  |
|     |                    | 121  | 38.9 | 14.6 |  |
| 14  | SOUTH ADRIATIC C   | 3    | 38.4 | 19.1 |  |
|     |                    | 590  | 38.8 | 13.7 |  |
| 13  | SOUTH ADRIATIC CW  | 3    | 37.2 | 19.7 |  |
|     |                    | 263  | 38.8 | 13.9 |  |
| 12  | SOUTH ADRIATIC NW  | 3    | 38.6 | 18.4 |  |
|     |                    | 129  | 38.7 | 13.2 |  |
| 11  | SOUTH ADRIATIC CN  | 3    | 38.8 | 18.4 |  |
|     |                    | 1121 | 38.7 | 13.2 |  |

---

**Table S5.** Water characteristics at surface (2–3 m) and bottom (different depths) of 24 stations for the collection of microplankton samples in South Adriatic Sea. Period of collection: 3–13 March 2015.

| STATION | LOCALITY           | DEPTH m | SAL  | psu  | TEMP °C |
|---------|--------------------|---------|------|------|---------|
| CaB     | CANYON BARI        | 2       | 38.8 | 14.9 |         |
|         |                    | 209     | 38.7 | 14.6 |         |
| 2       | GARGANO            | 2       | 38.2 | 13.3 |         |
|         |                    | 117     | 38.6 | 14.0 |         |
| 3       | PELAGOSA           | 2       | 38.7 | 14.6 |         |
|         |                    | 173     | 38.8 | 14.1 |         |
| 11      | SOUTH ADRIATIC CN  | 2       | 38.6 | 14.2 |         |
|         |                    | 1142    | 38.7 | 13.2 |         |
| 12      | SOUTH ADRIATIC NW  | 3       | 38.6 | 14.5 |         |
|         |                    | 131     | 38.7 | 14.4 |         |
| 13      | SOUTH ADRIATIC CW  | 2       | 38.7 | 14.5 |         |
|         |                    | 255     | 38.7 | 14.6 |         |
| PnG     | PENNA GROSSA       | 3       | 36.3 | 11.4 |         |
|         |                    | 61      | 37.6 | 12.7 |         |
| 14      | SOUTH ADRIATIC CC  | 3       | 38.7 | 14.3 |         |
|         |                    | 595     | 38.8 | 14.0 |         |
| 10      | SOUTH ADRIATIC NE  | 3       | 38.7 | 14.3 |         |
|         |                    | 1117    | 38.7 | 13.2 |         |
| Al2     | ALBANIAN SHELF 2   | 2       | 38.8 | 15.2 |         |
|         |                    | 67      | 38.8 | 15.2 |         |
| 8       | ALBANIAN SHELF 1   | 3       | 38.8 | 15.2 |         |
|         |                    | 281     | 38.8 | 14.5 |         |
| 15      | SOUTH ADRIATIC CE  | 2       | 38.7 | 15.2 |         |
|         |                    | 814     | 38.7 | 13.3 |         |
| Al3     | ALBANIAN SHELF 3   | 2       | 38.3 | 14.6 |         |
|         |                    | 64      | 38.8 | 15.4 |         |
| 17      | OTRANTO CHANNEL NE | 2       | 38.8 | 15.6 |         |
|         |                    | 333     | 38.9 | 15.2 |         |
| 21      | OTRANTO CHANNEL S  | 3       | 38.8 | 15.4 |         |
|         |                    | 965     | 38.8 | 13.7 |         |
| 22      | OTRANTO CHANNEL SE | 2       | 38.6 | 15.2 |         |
|         |                    | 953     | 38.8 | 13.7 |         |
| Rre     | RREZA              | 2       | 38.4 | 14.8 |         |
|         |                    | 197     | 38.8 | 15.6 |         |
| Kar1    | KARABURUN 1        | 2       | 38.4 | 14.9 |         |
|         |                    | 83      | 38.9 | 15.7 |         |
| Kar2    | KARABURUN 2        | 2       | 38.7 | 15.3 |         |
|         |                    | 224     | 38.9 | 15.8 |         |
| Kar3    | KARABURUN 3        | 2       | 38.9 | 15.8 |         |
|         |                    | 655     | 38.8 | 14.0 |         |
| 19      | OTRANTO CHANNEL NW | 2       | 38.4 | 13.9 |         |
|         |                    | 115     | 38.7 | 14.5 |         |
| 20      | OTRANTO CHANNEL SW | 2       | 38.9 | 15.5 |         |
|         |                    | 727     | 38.7 | 13.8 |         |
| Otr     | OTRANTO            | 2       | 36.5 | 11.4 |         |
|         |                    | 83      | 38.5 | 14.1 |         |
| And     | ANDRANO            | 2       | 36.6 | 11.6 |         |
|         |                    | 80      | 38.2 | 13.6 |         |

**Table S6.** SIMPER analysis results. Above, taxa contribution of epipelagic community; below, taxa contribution of meso-pelagic community.

| <b>Average</b>        | <b>Similarity</b> | <b>35.42</b>    |                |                   |                 |
|-----------------------|-------------------|-----------------|----------------|-------------------|-----------------|
| <b>Taxon</b>          | <b>Av. Abund.</b> | <b>Av. Sim.</b> | <b>Sim./SD</b> | <b>Contrib. %</b> | <b>Cumul. %</b> |
| <i>Ceratium furca</i> | 6.21              | 5.75            | 1.00           | 16.23             | 16.23           |
| <i>Ceratium</i> spp   | 4.60              | 5.37            | 1.32           | 15.17             | 31.40           |
| <i>Peridinium</i>     | 3.18              | 5.10            | 1.03           | 14.41             | 45.81           |
| <i>Podolampas</i>     | 8.95              | 3.72            | 1.26           | 10.50             | 56.31           |
| <i>Prorocentrum</i>   | 5.84              | 3.05            | 0.80           | 8.62              | 64.93           |
| <i>Oxythoxum</i>      | 2.69              | 2.61            | 0.68           | 7.38              | 72.31           |
| <i>Gymnodinium</i>    | 3.09              | 2.17            | 0.73           | 6.13              | 78.44           |
| <i>Dinophysis</i>     | 4.02              | 1.97            | 0.87           | 5.55              | 84.00           |
| <i>Cladopyxis</i>     | 0.70              | 0.88            | 0.70           | 2.48              | 86.48           |
| <i>Eutimninus</i>     | 0.60              | 8.88            | 0.75           | 2.48              | 88.95           |
| <i>Ceratocoris</i>    | 0.56              | 0.78            | 0.59           | 2.19              | 91.15           |

  

| <b>Average</b>           | <b>Similarity</b> | <b>35.42</b> |      |       |       |
|--------------------------|-------------------|--------------|------|-------|-------|
| <i>Ceratium</i>          | 1.82              | 4.60         | 0.57 | 30.41 | 30.41 |
| <i>Oxythoxum</i>         | 0.92              | 3.16         | 0.43 | 20.91 | 51.32 |
| <i>Podolampas</i>        | 1.10              | 2.83         | 0.54 | 18.71 | 70.03 |
| <i>Gymnodinium</i>       | 35.18             | 0.80         | 0.27 | 5.26  | 75.29 |
| <i>Peridinium</i>        | 1.76              | 0.66         | 0.32 | 4.38  | 79.67 |
| <i>Cladopyxis</i>        | 0.11              | 0.55         | 0.25 | 3.64  | 83.31 |
| <i>Salpingella</i>       | 0.27              | 0.30         | 0.20 | 2.00  | 85.31 |
| <i>Dictyocysta</i>       | 1.94              | 0.29         | 0.20 | 1.93  | 87.24 |
| <i>Ciliophora</i> indet. | 2.18              | 0.28         | 0.26 | 1.85  | 89.09 |
| <i>Prorocentrum</i>      | 0.96              | 0.23         | 0.21 | 1.54  | 90.63 |

**Table S7.** Presence/abundance (ind L<sup>-1</sup>) of microplankton taxa, collected in 27 stations of Italian Seas, at 2 different depths (see Tab. 1), July 2017.

[illegible]
